# Supplementary material for: The Role of Belgian Airborne Sniffer Measurements in the MARPOL Annex VI Enforcement Chain
Source: MDPI journal article supplement (doi:10.3390/atmos14040623), 2023-03-25
Supplement: s1 [file s1]

# Supplementary Material: The Role of Belgian Airborne Sniffer Measurements in the MARPOL Annex VI Enforcement Chain

Ward Van Roy <sup>1,\*</sup>, Jean-Baptiste Merveille <sup>1</sup>, Kobe Scheldeman <sup>1</sup>, Annelore Van Nieuwenhove <sup>1</sup>, Benjamin Van Roozendaal <sup>1</sup>, Ronny Schallier <sup>1</sup> and Frank Maes <sup>2</sup>

<sup>1</sup> Royal Belgian Institute of Natural Sciences, 1000 Brussels, Belgium

<sup>2</sup> Faculty of Law & Criminology, University Ghent, 9000 Ghent, Belgium

\* Correspondence: wvanroy@naturalsciences.be

## 1. Additional figures

## 2. Additional tables

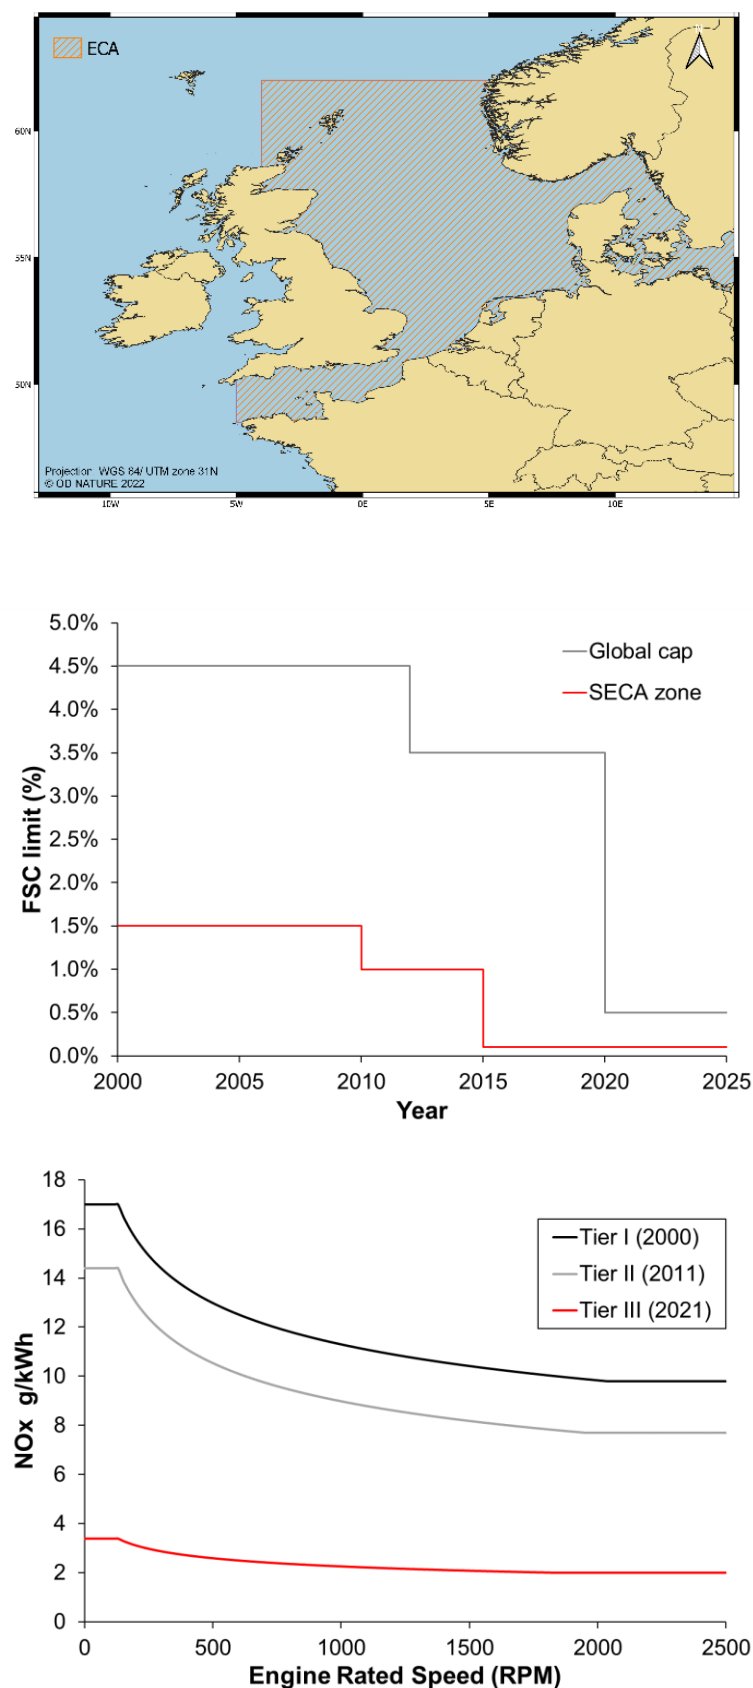

**Figure S1.** Emission Control Area (ECA) as defined by MARPOL Annex VI (**Upper**). Limits on the Fuel Sulfur Content of marine fuels according to the MARPOL Annex VI regulation 14 (**Middle**). NOx emission limits according to MARPOL Annex VI Regulation 13 (**Lower**).

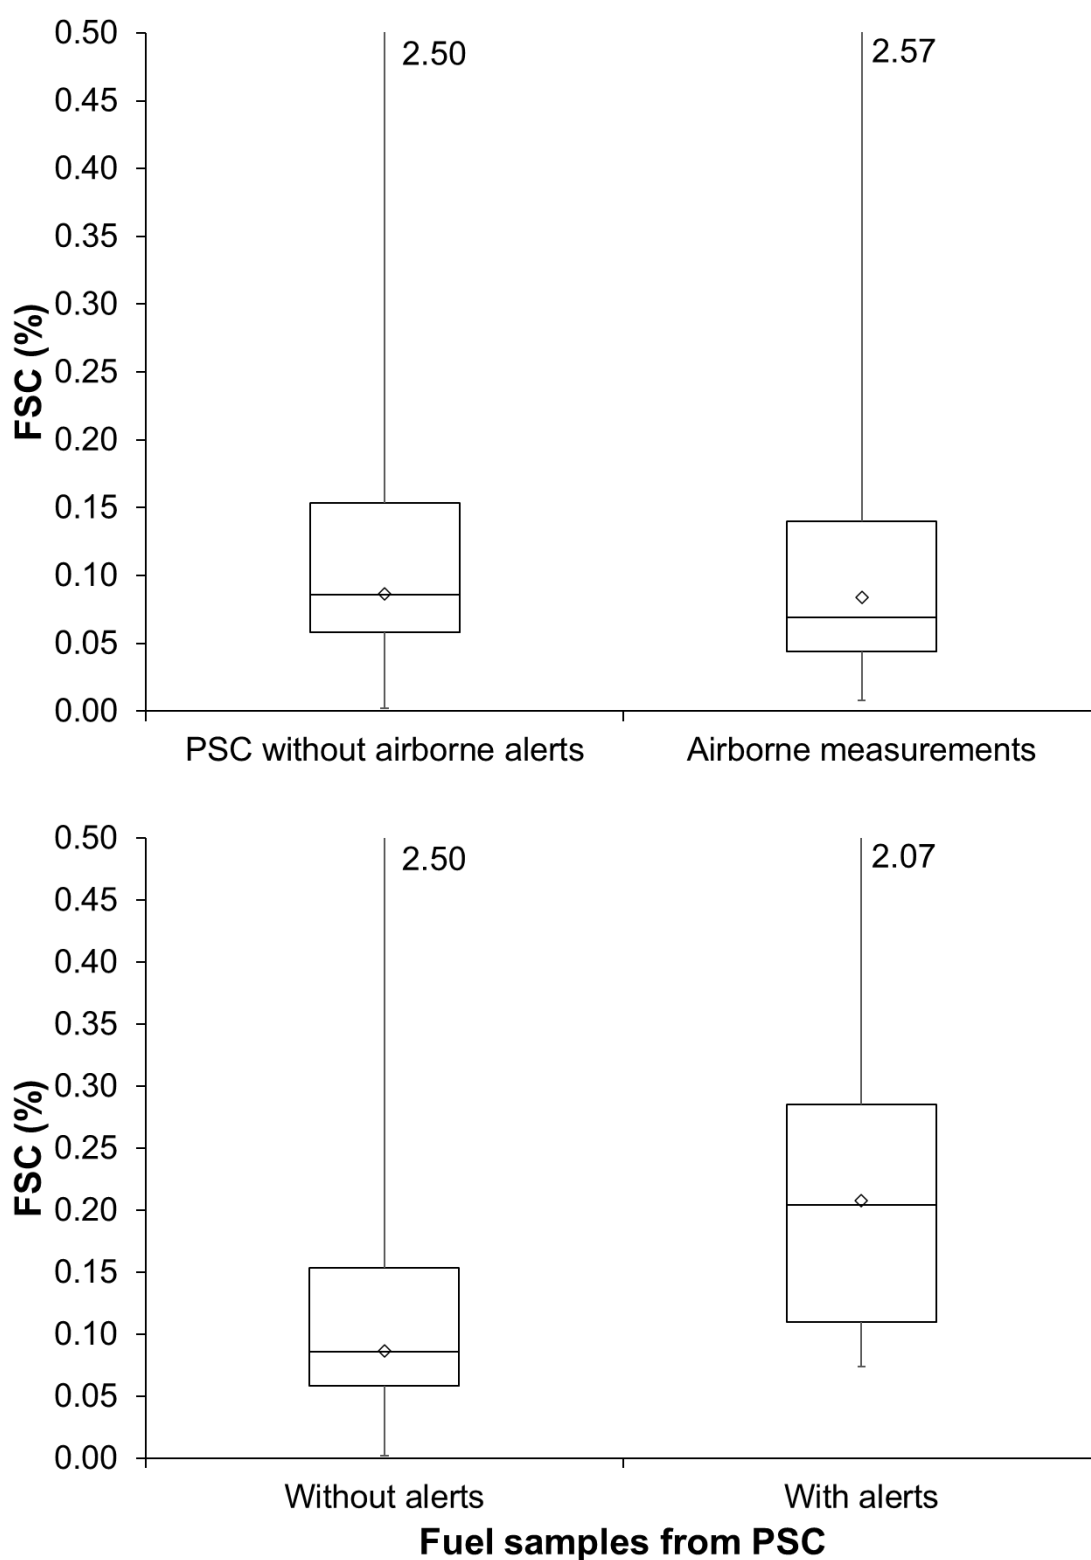

**Figure S2.** Boxplot comparison of results of fuel samples executed without airborne alerts and the results of the airborne measurements, with minimum, maximum median, average (♦), 25 and 75 percentiles (**Upper**). Comparison of results of fuel sample analysis executed by Belgian port inspection authorities initiated without and with the use of airborne alerts (**Lower**).

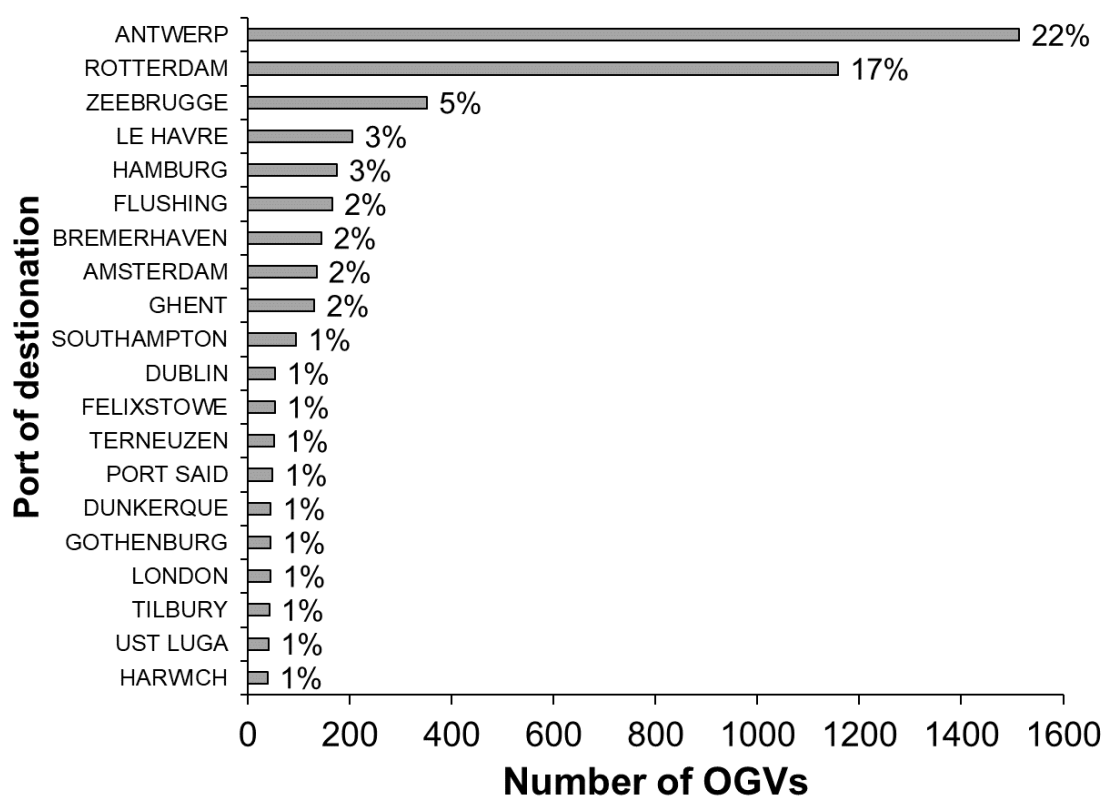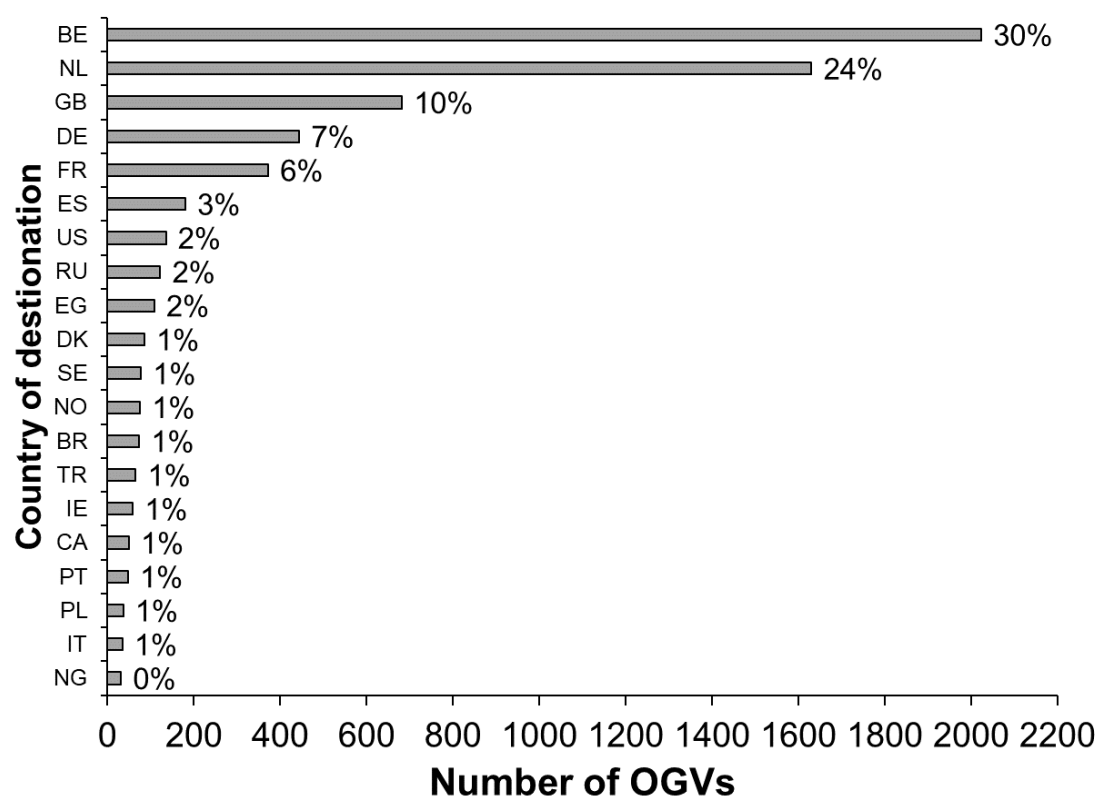

**Figure S3.** Number OGVs and relative amount of 20 most observed ports of destination (**Upper**) and country of destination (**Lower**).

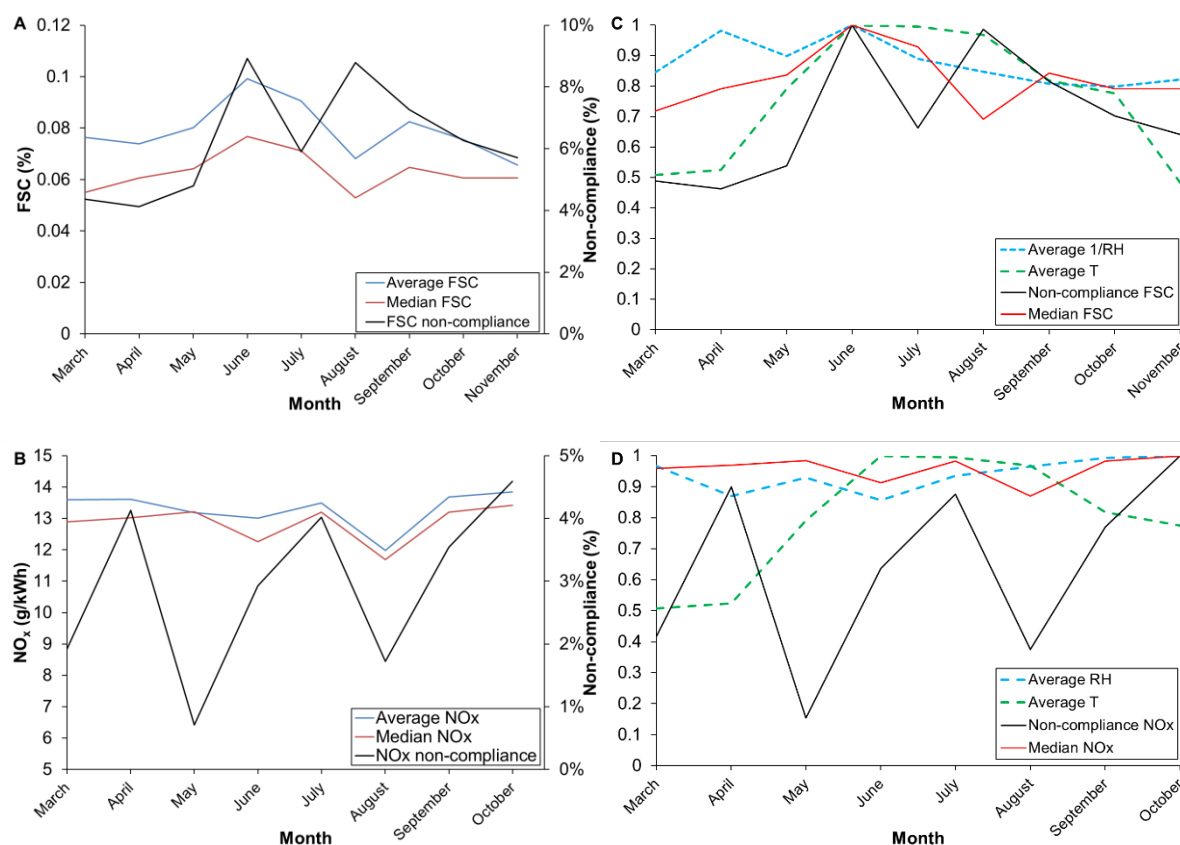

**Figure S4.** Monthly average, median and non-compliance values for FSC (A) and NO<sub>x</sub> (B). Normalized values for median and non-compliance for FSC (C) and NO<sub>x</sub> (D) compared to the normalized monthly values for *T* and *RH*. The months January, February and December were not included for FSC and additionally the month of November was not included for NO<sub>x</sub> due to the low amount of measurements for these months.

**Table S1.** Emission ratios for EGCS systems (MEPC, 2015).

| Fuel oil sulfur content<br>(% m/m) | Ratio emission<br>SO <sub>2</sub> (ppm)/CO <sub>2</sub> (% v/v) |
|------------------------------------|-----------------------------------------------------------------|
| 4.5                                | 195                                                             |
| 3.5                                | 151.7                                                           |
| 1.5                                | 65                                                              |
| 1                                  | 43.3                                                            |
| 0.5                                | 21.7                                                            |
| 0.1                                | 4.3                                                             |

**Table S2.** Test cycles and weighting factors according to the NO<sub>x</sub> Technical code (MEPC, 2008b).

|           |       |      |      |      |      |
|-----------|-------|------|------|------|------|
|           | Speed | 100% | 100% | 100% | 100% |
| <b>E2</b> | Power | 100% | 75%  | 50%  | 25%  |
|           | WF    | 0.2  | 0.5  | 0.15 | 0.15 |
|           | Speed | 100% | 91%  | 80%  | 63%  |
| <b>E3</b> | Power | 100% | 75%  | 50%  | 25%  |
|           | WF    | 0.2  | 0.5  | 0.15 | 0.15 |

**Table S3.**  $R^2$  values for the linear regression between the monthly values for: average FSC, median FSC, FSC non-compliance, average NO<sub>x</sub>, median NO<sub>x</sub>, NO<sub>x</sub> non-compliance, relative humidity (RH) and temperature (T).

| R <sup>2</sup>                 | RH   | T    | Average<br>NO <sub>x</sub> | Median<br>NO <sub>x</sub> | FSC non-<br>compliance | NO <sub>x</sub> non-<br>compliance | Average<br>FSC | Median<br>FSC |
|--------------------------------|------|------|----------------------------|---------------------------|------------------------|------------------------------------|----------------|---------------|
| Average FSC                    | 0.28 | 0.38 | 0.03                       | 0.05                      | 0.10                   | 0.03                               | -              | -             |
| Median FSC                     | 0.29 | 0.26 | 0.01                       | 0.03                      | 0.08                   | 0.08                               | -              | -             |
| FSC non-compliance             | 0.00 | 0.55 | 0.37                       | 0.45                      | -                      | 0.00                               | 0.10           | 0.08          |
| Average NO <sub>x</sub>        | 0.02 | 0.20 | -                          | -                         | 0.37                   | 0.32                               | 0.03           | 0.05          |
| Median NO <sub>x</sub>         | 0.06 | 0.08 | -                          | -                         | 0.45                   | 0.17                               | 0.01           | 0.03          |
| NO <sub>x</sub> non-compliance | 0.00 | 0.00 | 0.32                       | 0.17                      | 0.00                   | -                                  | 0.03           | 0.08          |

**Table S4.** Cost breakdown of the Belgian Sniffer program 2016–2022.

| Cost Category                                 | Year         |             |             |             |             |             |             |              |
|-----------------------------------------------|--------------|-------------|-------------|-------------|-------------|-------------|-------------|--------------|
|                                               | 2016         | 2017        | 2018        | 2019        | 2020        | 2021        | 2022        | Total        |
| Instrumentation                               |              |             |             |             |             |             |             |              |
| Sensor and installation                       | € 233,010.00 | € 1,624.00  | € -         | € 63,479.49 | € 23,587.77 | € 51,263.64 | € 15,542.19 | € 388,507.09 |
| Calibration and gases                         | € 9,509.97   | € 4,651.87  | € 7,829.61  | € 9,913.42  | € 6,966.36  | € 12,676.03 | € 9,800.25  | € 61,347.51  |
| General Equipment                             | € 2,614.76   | € -         | € 639.83    | € 1,809.47  | € 1,167.47  | € -         | € 744.93    | € 6,976.46   |
| Software                                      | € 23,000.00  | € -         | € -         | € 501.83    | € -         | € -         | € 1,689.16  | € 25,190.99  |
| Hardware                                      | € 20,790.04  | € 1,007.65  | € 561.74    | € 717.35    | € -         | € 6,795.52  | € 162.87    | € 30,035.17  |
| Total Instrumentation cost                    | € 288,924.77 | € 7,283.52  | € 9,031.18  | € 76,421.56 | € 31,721.60 | € 70,735.19 | € 27,939.40 | € 512,057.22 |
| Platform                                      |              |             |             |             |             |             |             |              |
| Fuel for sniffer Flight Hours (FH)            | € 31,219.67  | € 17,167.05 | € 20,301.17 | € 68,753.38 | € 7,751.34  | € 23,005.80 | € 28,771.99 | € 196,970.40 |
| Regular Maintenance                           | € 98,915.52  | € 99,792.92 | € 78,709.51 | € 89,076.17 | € 78,210.00 | € 74,301.00 | € 87,656.54 | € 179,233.85 |
| Part Regular Maintenance for sniffer FH       | € 39,199.93  | € 27,497.48 | € 23,774.49 | € 27,221.00 | € 12,583.22 | € 23,147.09 | € 25,810.64 |              |
| Major Maintenance (unit cost per flight hour) |              |             |             |             |             |             |             |              |
| Engine overhaul (2800 EH)                     |              | € 48.70     |             |             |             |             |             |              |
| Propeller overhaul (2800 EH)                  |              |             |             |             | € 3.93      |             |             |              |
| Repaint (2800 EH)                             |              | € 15.04     |             |             |             |             |             |              |
| 500 (EH) maintenance                          | € 56.61      |             |             | € 30.61     |             |             |             |              |
| 1000 (EH) maintenance                         |              |             | € 27.25     |             |             | € 33.62     |             |              |
| Other unscheduled major parts (2800 EH)       |              | € 4.97      | € 14.53     |             | € 9.73      |             | € 7.04      |              |
| Part Major Maintenance for sniffer FH         | € 7,693.62   | € 5,496.73  | € 3,687.30  | € 2,941.12  | € 502.20    | € 3,323.24  | € 638.26    | € 24,282.47  |
| Total Platform cost                           | € 78,113.22  | € 50,161.25 | € 47,762.96 | € 98,915.50 | € 20,836.76 | € 49,476.14 | € 55,220.89 | € 400,486.72 |
| Labour                                        |              |             |             |             |             |             |             |              |
| Operator cost for sniffer FH                  | € 10,552.95  | € 5,356.83  | € 7,096.89  | € 7,627.37  | € 2,219.92  | € 8,739.20  | € 8,197.59  | € 49,790.76  |
| Part Mission cost for sniffer FH              | € 1,641.67   | € 979.87    | € 1,080.92  | € 1,215.30  | € 475.24    | € 1,278.08  | € 1,338.40  | € 8,009.48   |
| Pilot cost for sniffer FH                     | € 1,090.34   | € 1,403.61  | € 2,253.68  | € 2,305.11  | € 725.62    | € 1,783.25  | € 1,942.41  | € 11,504.02  |

|                          |              |             |             |              |             |              |             |              |
|--------------------------|--------------|-------------|-------------|--------------|-------------|--------------|-------------|--------------|
| <b>Total Labour cost</b> | € 13,284.95  | € 7,740.32  | € 10,431.49 | € 11,147.78  | € 3,420.78  | € 11,800.53  | € 11,478.41 | € 69,304.26  |
| <b>Total</b>             | € 380,322.94 | € 65,185.09 | € 67,225.63 | € 186,484.84 | € 55,979.14 | € 132,011.86 | € 94,638.70 | € 981,848.20 |
| <b>Total/flight hour</b> | € 2,798.21   | € 814.81    | € 761.76    | € 1,940.87   | € 1,523.24  | € 1,335.70   | € 1,043.81  | € 1,567.20   |
| Number of measurements   | 1219         | 887         | 1138        | 1232         | 405         | 1015         | 965         | 6975         |
| <b>Total/measurement</b> | € 312.00     | € 73.49     | € 59.07     | € 151.37     | € 138.22    | € 130.06     | € 98.07     | € 140.77     |
